# Supplementary material for: Post-Transcriptional Control of the Escherichia coli PhoQ-PhoP Two-Component System by Multiple sRNAs Involves a Novel Pairing Region of GcvB
Source: PubMed Central journal article supplement (PMC3536696; doi:10.1371/journal.pgen.1003156), 2013-01-03
Supplement: pgen.1003156.s005.pdf [file pgen.1003156.s005.pdf]

Table S2.  $\beta$ -galactosidase activities

Activities are expressed in Miller units (Mu), arbitrary units (au) or relative to the same strain transformed with the vector control, and whose activity is set up at 100% (%, experiment of Fig. 1A and S3B)

| Strain tested  | Average $\beta$ -galactosidase activity | Standard deviation | Figure |
|----------------|-----------------------------------------|--------------------|--------|
| MG1425/pSgrS   | 217,9 %                                 | 23,7               | 1A     |
| MG1425/pRydC   | 204,2 %                                 | 40,0               | 1A     |
| MG1425/pRybC   | 188,7 %                                 | 14,0               | 1A     |
| MG1425/pRprA   | 185,1 %                                 | 25,7               | 1A     |
| MG1425/pRydD   | 173,0 %                                 | 19,4               | 1A     |
| MG1425/pRyhB   | 171,5 %                                 | 32,0               | 1A     |
| MG1425/pMicC   | 161,3 %                                 | 5,47               | 1A     |
| MG1425/pRyhA   | 159,7 %                                 | 23,4               | 1A     |
| MG1425/pOxyS   | 152,9 %                                 | 24,9               | 1A     |
| MG1425/pRybB   | 145,0 %                                 | 5,67               | 1A     |
| MG1425/pOmrA   | 142,9 %                                 | 0,76               | 1A     |
| MG1425/pOmrB   | 137,7 %                                 | 13,0               | 1A     |
| MG1425/pRseX   | 121,1 %                                 | 5,18               | 1A     |
| MG1425/pMicF   | 115,8 %                                 | 11,5               | 1A     |
| MG1425/pGlmZ   | 106,2 %                                 | 3,74               | 1A     |
| MG1425/pBRplac | 100                                     |                    | 1A     |
| MG1425/pSpk    | 97,4 %                                  | 0,83               | 1A     |
| MG1425/pGadY   | 93,1 %                                  | 1,88               | 1A     |
| MG1425/pCyaR   | 92,7 %                                  | 9,95               | 1A     |
| MG1425/pGlmY   | 91,8 %                                  | 7,21               | 1A     |
| MG1425/pDicF   | 87,8 %                                  | 9,48               | 1A     |
| MG1425/pRyeB   | 84,6 %                                  | 7,94               | 1A     |
| MG1425/pDsrA   | 69,2 %                                  | 9,66               | 1A     |
| MG1425/pSpot42 | 59,8 %                                  | 0,56               | 1A     |
| MG1425/pMicA   | 33,2 %                                  | 5,24               | 1A     |
| MG1425/pGcvB   | 23,2 %                                  | 1,57               | 1A     |
| MG1511/pBRplac | 1760 Mu                                 | 53,0               | 1B     |
| MG1511/pGcvB   | 493,2 Mu                                | 20,5               | 1B     |
| MG1511/pSgrS   | 1813 Mu                                 | 126,9              | 1B     |
| MG1511         | 11,3 au                                 | 1,06               | 1C     |
| MG1521         | 21,5 au                                 | 1,32               | 1C     |
| MG1452/pBRplac | 1010 Mu                                 | 229,4              | 2A     |
| MG1452/pMicA   | 316,4 Mu                                | 45,8               | 2A     |
| MG1452/pGcvB   | 236,8 Mu                                | 50,2               | 2A     |
| MG1425         | 596,8 Mu                                | 36                 | 2B     |
| MG1768         | 1038 Mu                                 | 249                | 2B     |
| MG1430         | 516,2 Mu                                | 49,2               | 2B     |
| MG1709         | 1163 Mu                                 | 40,2               | 2B     |
| MG1428         | 397,3 Mu                                | 57,7               | 2B     |

|                     |          |      |     |
|---------------------|----------|------|-----|
| MG1769              | 880.2 Mu | 94.6 | 2B  |
| MG1585/pBRplac      | 13.99 au | 1.34 | 3C  |
| MG1585/pGcvB        | 2.10 au  | 0.63 | 3C  |
| MG1585/pGcvBmutR1   | 3.04 au  | 0.41 | 3C  |
| MG1585/pGcvBmutR3   | 29.0 au  | 2.01 | 3C  |
| MG1585/pMicA        | 3.30 au  | 0.33 | 3C  |
| MG1585/pMicAmut     | 10.7 au  | 0.95 | 3C  |
| MG1586/pBRplac      | 20.0 au  | 1.80 | 3C  |
| MG1586/pGcvB        | 29.0 au  | 0.84 | 3C  |
| MG1586/pGcvBmutR1   | 22.5 au  | 2.01 | 3C  |
| MG1586/pGcvBmutR3   | 2.38 au  | 1.37 | 3C  |
| MG1586/pMicA        | 1.46 au  | 1.38 | 3C  |
| MG1586/pMicAmut     | 19.4 au  | 1.40 | 3C  |
| AC0067/pBRplac      | 19.5 Mu  | 0.44 | 3D  |
| AC0067/pGcvB        | 7.57 Mu  | 0.89 | 3D  |
| AC0067/pGcvBmutR1   | 14.1 Mu  | 1.15 | 3D  |
| KM112/pBRplac       | 7509 Mu  | 484  | 6A  |
| KM112/pMicA         | 2991 Mu  | 55   | 6A  |
| KM112/pMicAmut      | 7992 Mu  | 456  | 6A  |
| KM112/pGcvB         | 7866 Mu  | 393  | 6A  |
| KM112/pGcvBmutR1    | 3910 Mu  | 117  | 6A  |
| KM112/pGcvBmutR3    | 7228 Mu  | 353  | 6A  |
| MG1173/pBRplac      | 296.1 Mu | 10.8 | 6A  |
| MG1173/pMicA        | 108.2 Mu | 6.1  | 6A  |
| MG1173/pMicAmut     | 300.7 Mu | 13.0 | 6A  |
| MG1173/pGcvB        | 324.0 Mu | 17.9 | 6A  |
| MG1173/pGcvBmutR1   | 122.9 Mu | 5.01 | 6A  |
| MG1173/pGcvBmutR3   | 387.5 Mu | 56.4 | 6A  |
| MG1528/pBRplac      | 105.6 Mu | 3.1  | 6A  |
| MG1528/pMicA        | 40.1 Mu  | 1.3  | 6A  |
| MG1528/pMicAmut     | 112.4 Mu | 6.4  | 6A  |
| MG1528/pGcvB        | 169.9 Mu | 29.5 | 6A  |
| MG1528/pGcvBmutR1   | 59.2 Mu  | 5.7  | 6A  |
| MG1528/pGcvBmutR3   | 93.6 Mu  | 2.9  | 6A  |
| KM194/pBRplac       | 239.1 Mu | 1.19 | 6A  |
| KM194/pMicA         | 82.5 Mu  | 4.47 | 6A  |
| KM194/pMicAmut      | 215.2 Mu | 6.80 | 6A  |
| KM194/pGcvB         | 495.9 Mu | 24.7 | 6A  |
| KM194/pGcvBmutR1    | 114.2 Mu | 3.22 | 6A  |
| KM194/pGcvBmutR3    | 397.7 Mu | 38.1 | 6A  |
| MG1585/pBRplac      | 22.8 au  | 0.02 | S1A |
| MG1585/pMicA        | 7.0 au   | 1.10 | S1A |
| MG1585/pMicAmut     | 25.2 au  | 4.49 | S1A |
| MG1585/pGcvB        | 3.79 au  | 0.86 | S1A |
| MG1585/pGcvBmutR1   | 4.3 au   | 0.51 | S1A |
| MG1585/pGcvBmutR1R3 | 35.6 au  | 6.05 | S1A |
| MG1586/pBRplac      | 37.8 au  | 0.88 | S1A |
| MG1586/pMicA        | 5.92 au  | 0.83 | S1A |

|                     |          |       |     |
|---------------------|----------|-------|-----|
| MG1586/pMicAmut     | 45.2 au  | 5.61  | S1A |
| MG1586/pGcvB        | 44.1 au  | 2.81  | S1A |
| MG1586/pGcvBmutR1   | 45.5 au  | 9.40  | S1A |
| MG1586/pGcvBmutR1R3 | 4.05 au  | 0.43  | S1A |
| MG1511/pBRplac      | 1012 Mu  | 76.2  | S3A |
| MG1511/pMicA        | 342.9 Mu | 13.63 | S3A |
| MG1511/pMicAmut     | 1144 Mu  | 54.2  | S3A |
| MG1511/pGcvB        | 382.6 Mu | 71.4  | S3A |
| MG1511/pGcvBmutR1   | 279.0 Mu | 20.6  | S3A |
| MG1511/pGcvBmutR3   | 1163 Mu  | 186.1 | S3A |
| MG1793/pBRplac      | 562.8 Mu | 54.4  | S3A |
| MG1793/pMicA        | 262.5 Mu | 8.3   | S3A |
| MG1793/pMicAmut     | 546.0 Mu | 6.8   | S3A |
| MG1793/pGcvB        | 229.6 Mu | 7.5   | S3A |
| MG1793/pGcvBmutR1   | 188.6 Mu | 13.1  | S3A |
| MG1793/pGcvBmutR3   | 654.4 Mu | 92.0  | S3A |
| MG1715/pBRplac      | 100      |       | S3B |
| MG1715/pMicA        | 49.9%    | 10.6  | S3B |
| MG1715/pMicAmut     | 107.2%   | 25.3  | S3B |
| MG1715/pGcvB        | 76.6%    | 2.0   | S3B |
| MG1715/pGcvBmutR1   | 35.8%    | 4.6   | S3B |
| MG1715/pGcvBmutR3   | 126.1%   | 49.3  | S3B |
| MG1718/pBRplac      | 100      |       | S3B |
| MG1718/pGcvB        | 364.9%   | 40.4  | S3B |
